# Supplementary material for: Improving the efficacy of exome sequencing at a quaternary care referral centre: novel mutations, clinical presentations and diagnostic challenges in rare neurogenetic diseases
Source: HighWire-hosted journal article supplement (doi:10.1136/jnnp-2020-325437), 2021-06-08

**Supplemental table 1.** List of candidate gene filters used in the analysis of exome sequencing.

| <b>MYOPATHY</b> | <b>NEUROPATHY</b> | <b>MND</b> |
|-----------------|-------------------|------------|
| ABHD5           | AAAS              | AAAS       |
| ACADL           | AARS1             | AARS1      |
| ACADM           | ABCA1             | AGT        |
| ACADS           | ABCD1             | ALAD       |
| ACADVL          | ABHD12            | ALS2       |
| ACTA1           | ADCY6             | ANG        |
| ADSSL1          | AFG3L2            | APEX1      |
| AGL             | AIFM1             | APOE       |
| AGPAT2          | AMACR             | AR         |
| AGRN            | ANG               | ASAH1      |
| AIRE            | AP1S1             | ATM        |
| ALDOA           | APOA1             | ATP7A      |
| ALG14           | APTX              | ATXN2      |
| ALG2            | ARHGEF10          | ATXN3      |
| ALG3            | ARL6IP1           | B4GALT6    |
| ANKRD2          | ARSA              | BCL11B     |
| ANO5            | ASAH1             | BCL6       |
| ASCC1           | ATL1              | BICD2      |
| ATGL            | ATL3              | BSCL2      |
| ATP2A1          | ATM               | C19orf12   |
| ATRN            | ATXN1             | C9orf72    |
| B3GALNT2        | ATXN10            | CCS        |
| B3GNT2          | ATXN2             | CDH13      |
| BAG3            | ATXN3             | CDH22      |
| BIN1            | ATXN7             | CHCHD10    |
| BSCL2           | B2M               | CHMP2B     |
| BVES            | B4GALNT1          | CNTF       |
| CACNA1S         | BAG3              | CNTN4      |
| CAPN3           | BCKDHB            | CNTN6      |
| CASQ1           | BSCL2             | CRIM1      |
| CAV1            | C12orf65          | CRYM       |
| CAV3            | C9orf72           | CSNK1G3    |
| CAVIN1          | CLP1              | CST3       |
| CCDC78          | CNTNAP1           | CUL4B      |
| CDKN1C          | COX10             | CYP2D6     |
| CFL2            | COX6A1            | DAO        |

|         |         |         |
|---------|---------|---------|
| CHAT    | CPOX    | DCAF15  |
| CHCHD10 | CRYAB   | DCTN1   |
| CHD7    | CTDP1   | DIAPH3  |
| CHKB    | CTSA    | DISC1   |
| CHN1    | CYP27A1 | DNAJB2  |
| CHRM3   | DARS2   | DOC2B   |
| CHRNA1  | DDHD1   | DPP6    |
| CHRN1   | DGUOK   | DYNC1H1 |
| CHRND   | DHH     | EFEMP1  |
| CHRNE   | DHTKD1  | ELP3    |
| CIDEC   | DMD     | EPHA4   |
| CLCN1   | DNAJB2  | EWSR1   |
| CLN3    | DNAJC3  | EXOSC3  |
| CNBP    | DNM2    | FBLN5   |
| CNTN1   | DYNC1H1 | FBXO38  |
| COA3    | EGR2    | FEZF2   |
| COL12A1 | EMD     | FGGY    |
| COL13A1 | ERCC6   | FIG4    |
| COL6A   | ERCC8   | FUS     |
| COL6A1  | FAH     | GARS1   |
| COL6A2  | FAM126A | GBE1    |
| COL6A3  | FBLN5   | GMPPA   |
| COL9A3  | FGD4    | GRB14   |
| COLQ    | FGF14   | GRN     |
| COX10   | FIG4    | HEXA    |
| COX15   | FLNC    | HFE     |
| CPT2    | FLRT1   | HINT1   |
| CRAT    | FLVCR1  | HSPB1   |
| CRPPA   | FMR1    | HSPB3   |
| CRYAB   | FUS     | HSPB8   |
| CTNS    | FXN     | IGHMBP2 |
| DAG1    | GALC    | ITPR2   |
| DECR1   | GAN     | KDR     |
| DES     | GARS1   | KIFAP3  |
| DGUOK   | GBA2    | KLHL9   |
| DIH1    | GBE1    | LAMA2   |
| DMD     | GDAP1   | LAS1L   |
| DMPK    | GJB1    | LIF     |
| DNAJB6  | GJB3    | LIPC    |
| DNAJC19 | GLA     | LOX     |

|           |         |         |
|-----------|---------|---------|
| DNM2      | GNB4    | LUM     |
| DNMT3B    | GSN     | MAOB    |
| DOK7      | HADHA   | MAPT    |
| DPAGT1    | HADHB   | MATR3   |
| DPM2      | HARS1   | MT-ND2  |
| DPM3      | HINT1   | MYH14   |
| DTNA      | HK1     | NAIP    |
| DURS1     | HMBS    | NEFH    |
| DUX4      | HOXD10  | NETO1   |
| DYSF      | HSD17B4 | NT5C1A  |
| ECEL1     | HSPB1   | ODR4    |
| EMD       | HSPB8   | OGG1    |
| ENO3      | IFRD1   | OMA1    |
| EPM2A     | IGHMBP2 | OPTN    |
| ETFA      | INF2    | PCP4    |
| ETFDH     | KARS1   | PFN1    |
| FHL1      | KIF1A   | PGRN    |
| FKBP14    | KIF1B   | PLEKHG5 |
| FKRP      | KIF1C   | PNPLA6  |
| FKTN      | KIF5A   | PON1    |
| FLAD1     | LAMA2   | PON2    |
| FLNC      | LDB3    | PON3    |
| FOXL2     | LITAF   | PRPH    |
| GAA       | LMNA    | PSEN1   |
| GBE1      | LRSAM1  | PVR     |
| GFPT1     | LYST    | RAMP3   |
| GK        | MAF     | RBM28   |
| GMPPB     | MARS1   | RBMS1   |
| GNE       | MED25   | REEP1   |
| GYG1      | MFN2    | RNF19A  |
| GYS1      | MMACHC  | SCN7A   |
| HACD1     | MPV17   | SCN9A   |
| HADH      | MPZ     | SCO2    |
| HADHA     | MT-ATP6 | SCP2    |
| HADHB     | MT-ATP8 | SELL    |
| HK1       | MT-RNR1 | SEMA6A  |
| HNRNPA1   | MT-TK   | SETX    |
| HNRNPA2B1 | MT-TL1  | SIGMAR1 |
| HNRNPDL   | MTMR2   | SLC1A2  |
| HOXA1     | MTPP    | SLC52A2 |

|         |         |         |
|---------|---------|---------|
| HSPB8   | MYH14   | SLC52A3 |
| HSPG2   | MYOT    | SLC5A7  |
| IGHMBP2 | NAGA    | SMN1    |
| INPP5K  | NALCN   | SMN2    |
| INSR    | NDRG1   | SNCG    |
| ISCA1   | NEFL    | SOD1    |
| ISCA2   | NF2     | SOD2    |
| ITGA7   | NIPA1   | SOX5    |
| KBTBD13 | NOP56   | SPAST   |
| KCNJ6   | OAT     | SPG11   |
| KIF21A  | OPA1    | SPG7    |
| KLHL40  | OPTN    | SPTLC1  |
| KLHL41  | PANK2   | SQSTM1  |
| KLHL9   | PDHA1   | SUSD1   |
| KY      | PDK3    | SYT9    |
| LAMA2   | PDYN    | TAF15   |
| LAMA5   | PEX1    | TARDBP  |
| LAMB2   | PEX10   | TBK1    |
| LAMP2   | PEX7    | TRPV4   |
| LARGE1  | PHYH    | TUBA4A  |
| LDB3    | PLA2G6  | UBA1    |
| LDHA    | PLEKHG5 | UBQLN2  |
| LIMS2   | PLOD1   | UNC13A  |
| LPIN1   | PLP1    | VAPB    |
| LMNA    | PMM2    | VCP     |
| LMNB2   | PMP2    | VDR     |
| LMOD3   | PMP22   | VEGFA   |
| LONP1   | PNKP    | VPS54   |
| LRP4    | PNPLA6  | VRK1    |
| MADD    | POLG    | ZFP64   |
| MAFB    | PPOX    | ZFYVE26 |
| MAP3K20 | PPP2R2B | ZNF746  |
| MATR3   | PRNP    |         |
| MDM1    | PRPS1   |         |
| MECR    | PRX     |         |
| MEGF10  | RAB7A   |         |
| MGCA1   | RNASEH1 |         |
| MSC     | RRM2B   |         |
| MSTN    | SACS    |         |
| MSTO1   | SBF1    |         |

|         |          |
|---------|----------|
| MTAP    | SBF2     |
| MTM1    | SCO2     |
| MTMR14  | SCP2     |
| MUSK    | SEPTIN9  |
| MYBPC3  | SETX     |
| MYF6    | SH3TC2   |
| MYH14   | SLC12A6  |
| MYH2    | SLC25A19 |
| MYH7    | SLC52A2  |
| MYO18B  | SNAP29   |
| MYO9A   | SOD1     |
| MYOT    | SOX10    |
| MYOZ1   | SPART    |
| MYPN    | SPAST    |
| NADK2   | SPG11    |
| NALCN   | SPG7     |
| NEB     | SPTLC1   |
| NHLRC1  | SPTLC2   |
| P4HA1   | ST3      |
| PABPN1  | SURF1    |
| PFKM    | TARDBP   |
| PGAM2   | TDP1     |
| PGK1    | TFG      |
| PGM1    | TRAF3    |
| PHKA1   | TRIM2    |
| PHKB    | TRPV4    |
| PHOX2A  | TSFM     |
| PIEZO2  | TTPA     |
| PIK3R1  | TTR      |
| PLEC    | TUBB3    |
| PLIN1   | TWINK    |
| PNPLA2  | TYMP     |
| POGLUT1 | UBQLN2   |
| POLD1   | VCP      |
| POLG    | XPA      |
| POMGNT1 | YARS1    |
| POMGNT2 | ZFYVE26  |
| POMT1   |          |
| POMT2   |          |
| PPARG   |          |

PREPL  
PRKAG2  
PSMB8  
PYGM  
PYROXD1  
RAPSN  
RBCK1  
ROBO3  
RPH3A  
RS1  
RXYLT1  
RYS1  
SALL4  
SBDS  
SCN4A  
SCO1  
SCO2  
SECISBP2  
SELENON  
SETX  
SGCA  
SGCB  
SGCD  
SGCE  
SGCG  
SGCZ  
SLC18A3  
SLC22A5  
SLC23A20  
SLC25A1  
SLC25A20  
SLC25A26  
SLC25A3  
SLC25A4  
SLC25A46  
SLC5A7  
SMAD4  
SMARD1  
SMCHD1  
SMN1

SNAP25  
SPEG  
SPTBN4  
SPTLC1  
SQSTM1  
SRPK3  
SSPN  
STIM1  
SUCLA2  
SURF1  
SYN2  
SYNE1  
SYNE2  
SYT1  
SYT2  
TANGO2  
TAZ  
TBX5  
TCAP  
TCF21  
TGFB1  
TIA1  
TIMM50  
TK2  
TMEM126B  
TMEM43  
TMEM70  
TMPO  
TNNT1  
TNNT3  
TNPO3  
TNXB  
TOR1AIP1  
TPI1  
TPM2  
TPM3  
TRAPPC11  
TRDN  
TRDMT1  
TRIM32

TRIP4  
TTN  
TUBB2B  
TUBB3  
TWIST1  
TWIST2  
TWNK  
TYMP  
UNC13a  
UNC50  
VAMP1  
VCP  
VMA21  
XK  
VBTB42  
ZC4H2  
ZMPSTE24



**Supplemental table 2.** Known pathogenic variants identified by exome sequencing.

| ID<br>Diagnosis              | Gene           | Chr: position           | Coding<br>effect | c.DNA change<br>protein change                                                    | Ref      |
|------------------------------|----------------|-------------------------|------------------|-----------------------------------------------------------------------------------|----------|
| S.2<br>MPD5                  | <i>ADSSL1</i>  | 14:105207568            | Het              | NM_199165.2:c.910G>A<br>p.Asp304Asn                                               | 26506222 |
| S.3<br>MPD5                  | <i>ADSSL1</i>  | 14:105207568            | Hom              | NM_199165.2:c.910G>A<br>p.Asp304Asn                                               | 32331917 |
| S.16<br>CTX                  | <i>CYP27A1</i> | 2:219678909             | Hom              | NM_000784.3:c.1183C>T<br>p.Arg395Cys                                              | 2019602  |
| S.5<br>BMD                   | <i>DMD</i>     | X:31893255_<br>31986835 | Hemi             | NM_004006.2:c.6683_7342del<br>p.Glu2147_Lys2366del                                | 2063877  |
| F.8.1; F.9.1<br>LGMD1D       | <i>DNAJB6</i>  | 7:157160096             | Het              | NM_058246.3:c.265T>A<br>p.Phe89Ile                                                | 22366786 |
| F.2.1; F.2.2<br>CMS10        | <i>DOK7</i>    | 4:3494837_<br>3494840   | Hom              | NM_173660.5:c.1124_1127dupTGCC<br>p.Ala378Serfs*30                                | 16917026 |
| S.23<br>CMT2D                | <i>GARS</i>    | 7:30671914              | Het              | NM_002047.2:c.1955G>C<br>p.Gly652Ala                                              | 25168514 |
| F.1.1; F.1.2<br>APBD         | <i>GBE1</i>    | 3:81691938              | Het              | NM_000158.3:c.986A>C<br>p.Tyr329Ser                                               | 25665141 |
|                              |                | 3:81542964_<br>81542972 | Het              | NM_000158.3:c.2053-3358_2053-<br>3350delinsTGTTTTTTACATTACAGGT<br>p.Tyr686Serfs*3 | 25665141 |
| F.4.1; F.4.2<br>Amyloidosis  | <i>GSN</i>     | 9:124073097             | Het              | NM_000177.4:c.640G>T<br>p.Asp214Tyr                                               | 1338910  |
| F.6.1<br>Sandhoff<br>disease | <i>HEXB</i>    | 5:74014629              | Het              | NM_000521.3:c.1250C>T<br>p.Pro417Leu                                              | 25736553 |
|                              |                | 5:73980812_<br>73993196 | Het              | NM_000521.3:c.1_786del<br>p.Met1_Leu223del                                        | 25736553 |
|                              | <i>SH3TC2</i>  | 5:148406435             | Het              | NM_024577.3:c.2860C>T<br>p.Arg954Ter                                              | 25736553 |
| F.3.1; F.3.2<br>LGMDR23      | <i>LAMA2</i>   | 6:129371234             | Het              | NM_000426.3:c.283+1G>A<br>p.(?)                                                   | 20207543 |
| S.12<br>CMT2A                | <i>MFN2</i>    | 1:12052717              | Het              | NM_014874.3:c.281G>A<br>p.Arg94Gln                                                | 15064763 |
| F10.1<br>ALS8                | <i>VAPB</i>    | 20:56993374             | Het              | NM_004738.4:c.166C>T<br>p.Pro56Ser                                                | 29560381 |

**Supplemental figure 1**

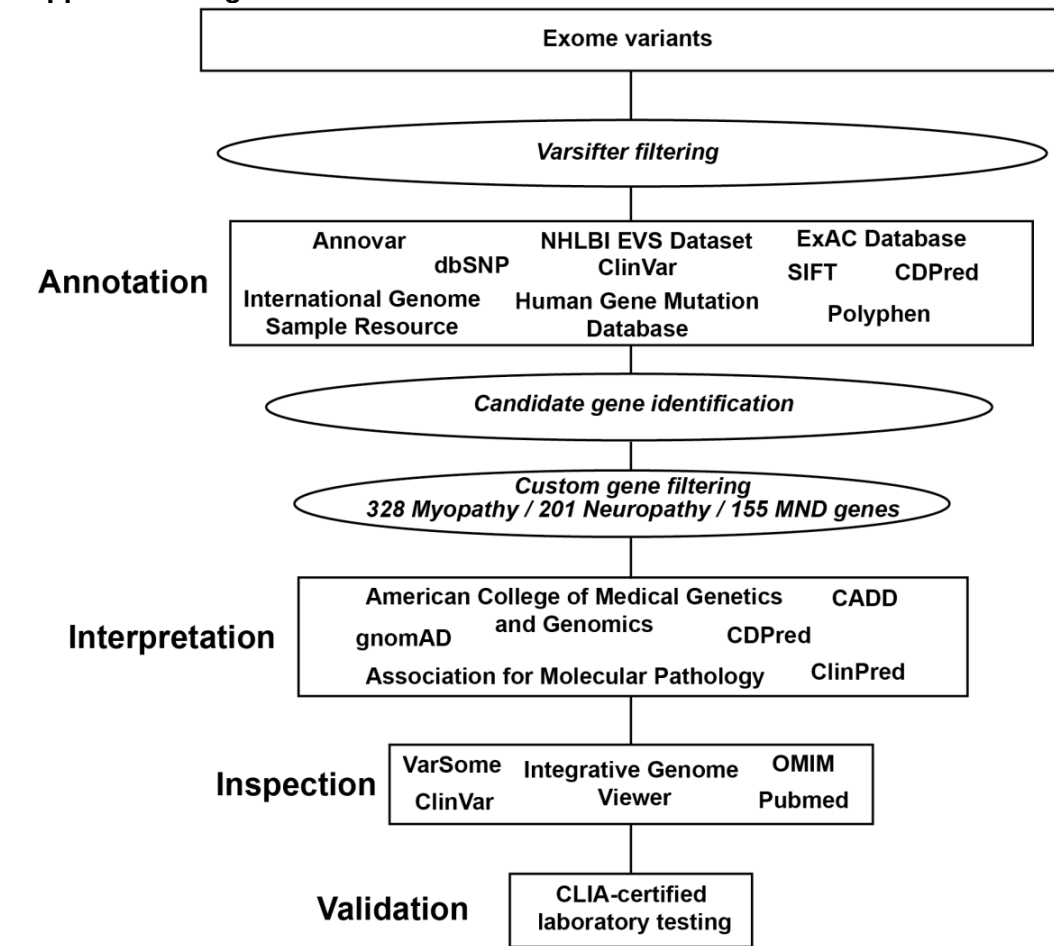

## Supplemental figure 2

A.

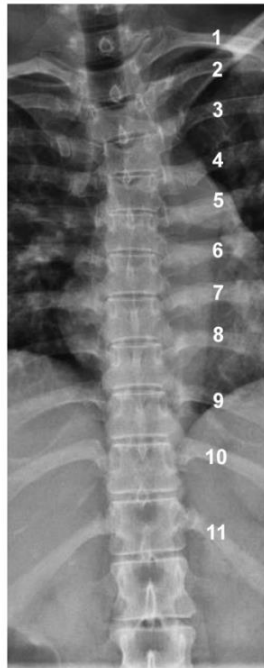

B.

| Test                                     | S.16     | Control<br>(mean $\pm$ SD) |
|------------------------------------------|----------|----------------------------|
| 1. Neuropsychological Assessment:        |          |                            |
| Attention (Part A to D)                  | 19 to 28 | 50 $\pm$ 10                |
| Auditory comprehension                   | 19       | 50 $\pm$ 10                |
| Bill payment                             | 19       | 50 $\pm$ 10                |
| Naming                                   | 25       | 50 $\pm$ 10                |
| 2. Delis Kaplan Executive function:      |          |                            |
| Letter fluency                           | 5        | 10 $\pm$ 3                 |
| Category switching                       | 6        | 10 $\pm$ 3                 |
| Number sequencing                        | 5        | 10 $\pm$ 3                 |
| 3. Motor speed and accuracy:             |          |                            |
| Grooved pegboard (dominant)              | 16       | 50 $\pm$ 10                |
| Grooved pegboard (non-dominant)          | 6        | 50 $\pm$ 10                |
| 4. Beery visual motor integration        | 50       | 100 $\pm$ 15               |
| 5. Adaptive behavior assessment          | 68       | 100 $\pm$ 15               |
| 6. Wechsler Adult Intelligence scale IV: |          |                            |
| Perceptual reasoning index               | 69       | 100 $\pm$ 15               |
| Processing speed index                   | 76       | 100 $\pm$ 15               |
| Full scale IQ                            | 73       | 100 $\pm$ 15               |
| 7. Beck depression inventory             | 29       |                            |

**Supplemental figure 3**

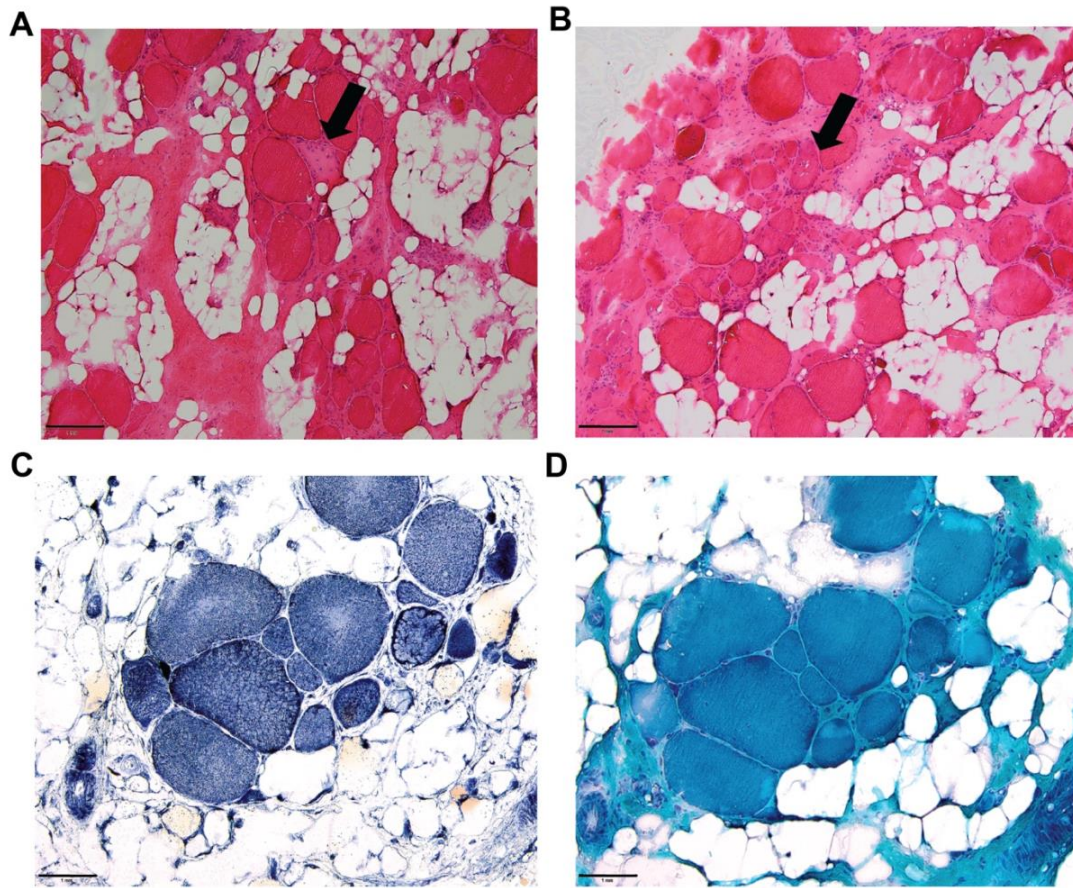

Supplemental figure 4

A

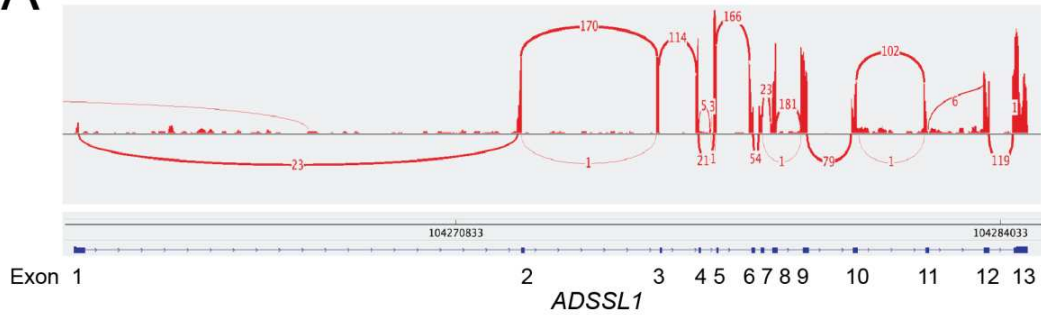

B

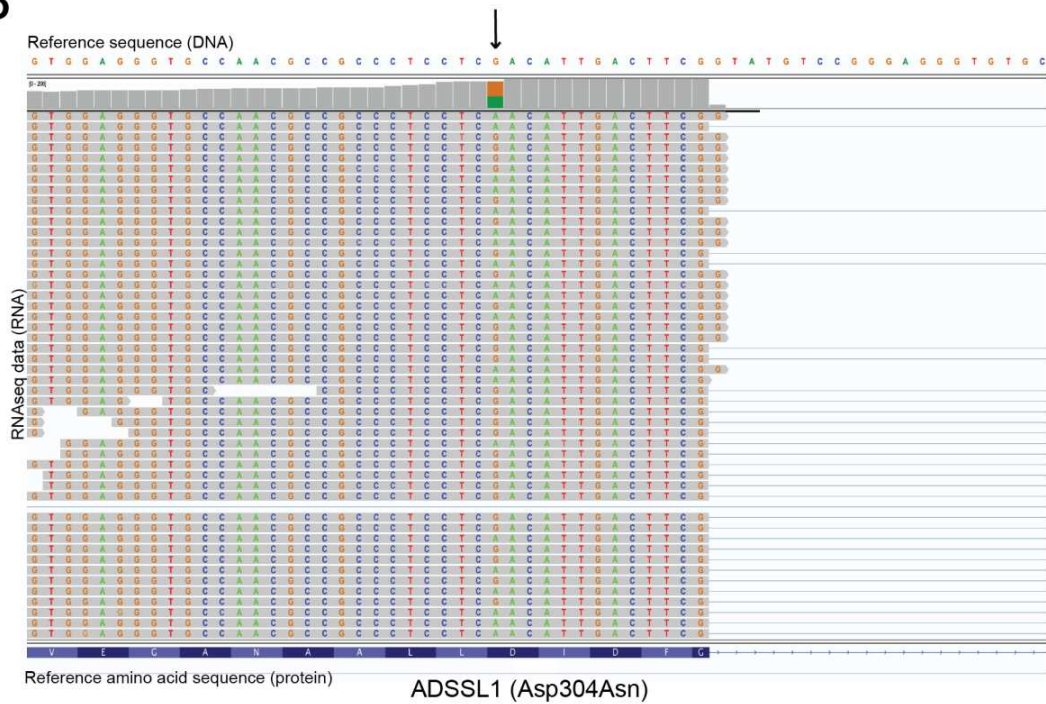

Supplement: jnnp-2020-325437supp001_data_supplement.pdf [file jnnp-2020-325437supp001_data_supplement.pdf]
